# Supplementary material
Source: PubMed Central journal article supplement (PMC5228586)
Supplement: NIHMS836342-supplement-supplement_1.pdf [file NIHMS836342-supplement-supplement_1.pdf]

## Supplemental Information

The Influence of Peripheral Substituent Modification on P<sup>V</sup>,  
Mn<sup>III</sup>, and Mn<sup>V</sup>(O) Corrolazines: X-ray Crystallography,  
Electrochemical and Spectroscopic Properties, and HAT and  
OAT Relativities

*Evan E. Joslin, Jan Paulo T. Zaragoza, Regina A. Baglia, Maxime A. Siegler, and David P. Goldberg\**

Department of Chemistry, The Johns Hopkins University, 3400 N. Charles Street, Baltimore,  
MD 21218, USA

\*Email: [dgp@jhu.edu](mailto:dgp@jhu.edu)

**General Procedures.** All reactions were performed using dry solvents and standard Schlenk techniques unless otherwise noted. Methylene chloride- $d_2$  was obtained from Cambridge Isotopes, Inc.  $\text{PPh}_3$  and  $\text{Bu}_4\text{N}^+\text{F}^-$  (tetrabutylammonium fluoride) were purchased from commercial sources and used without further purification. **Instrumentation.**  $^{31}\text{P}\{^1\text{H}\}$  NMR spectra were obtained on a Bruker 400 MHz (operating frequency 161.9 MHz) spectrometer and referenced against an external standard of  $\text{H}_3\text{PO}_4$  ( $\delta = 0$ ).

**OAT Product Analysis.**  $\text{PPh}_3$  (10 equiv) was added by syringe to a  $\text{CH}_2\text{Cl}_2$  solution of  $\text{Mn}^{\text{V}}(\text{O})(\text{MeOP}_8\text{Cz})$  (1.13 mM). The solution went immediately from a deep green to a dark brown, indicating conversion to  $\text{Mn}^{\text{III}}(\text{MeOP}_8\text{Cz})(\text{OPPh}_3)$ . The reaction was monitored by UV-Vis spectroscopy, which showed conversion to  $\text{Mn}^{\text{III}}(\text{MeOP}_8\text{Cz})$ . An amount of  $\text{Bu}_4\text{N}^+\text{F}^-$  (30 equiv) was then added to release the  $\text{OPPh}_3$ . The solution was then concentrated to dryness, reconstituted in  $\text{CD}_2\text{Cl}_2$  (450  $\mu\text{L}$ ) and immediately analyzed by  $^{31}\text{P}\{^1\text{H}\}$  NMR spectroscopy. The delay time (D1) was set to 150 s to allow for complete relaxation of the  $^{31}\text{P}$  nucleus. Comparison of the integration for the peaks  $\text{PPh}_3$  ( $\delta = -5.5$  ppm) and  $\text{OPPh}_3$  ( $\delta = 27.3$  ppm) gave a yield of 77% for  $\text{OPPh}_3$  (Figure S16).

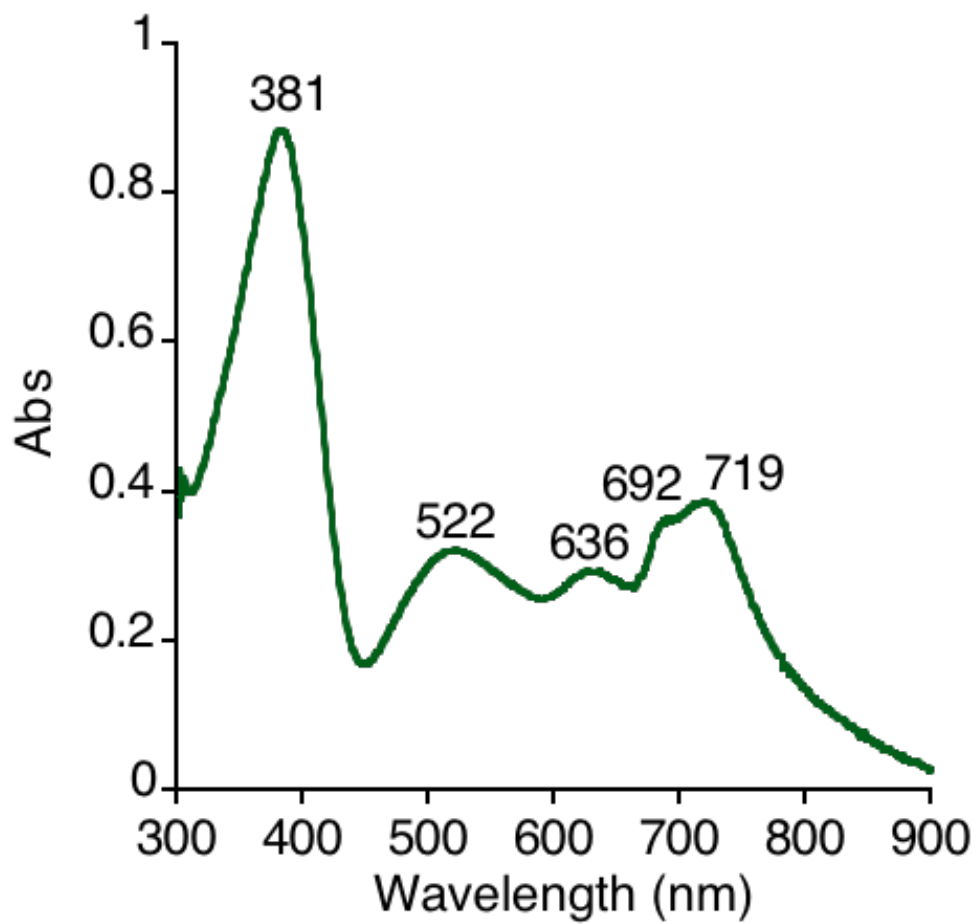

**Figure S1.** UV-vis spectrum of MeOP<sub>8</sub>PzH<sub>2</sub> in pyridine.

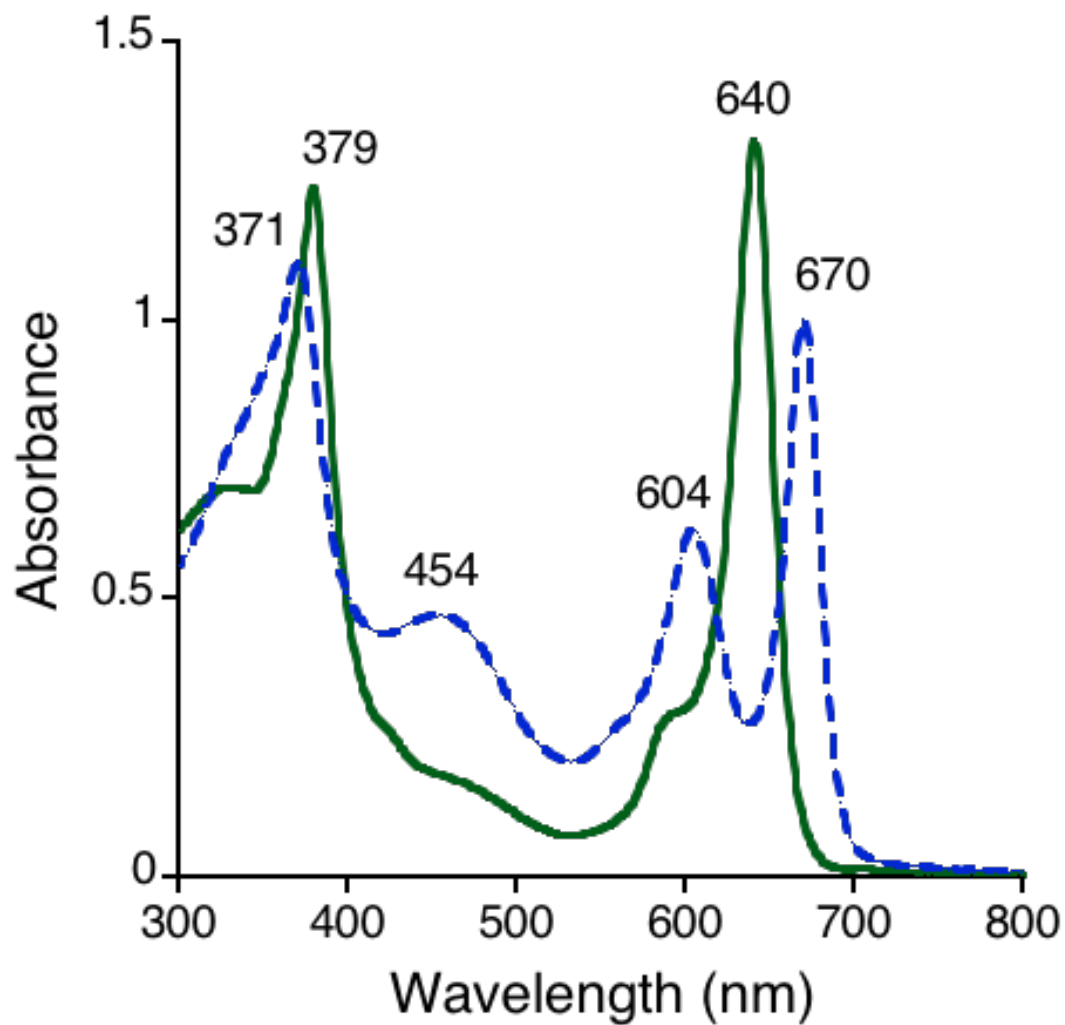

**Figure S2.** UV-vis spectrum of Mg(iPrP<sub>8</sub>Pz) (solid green line) and iPr<sub>8</sub>PzH<sub>2</sub> (dashed blue line) in CH<sub>2</sub>Cl<sub>2</sub>.

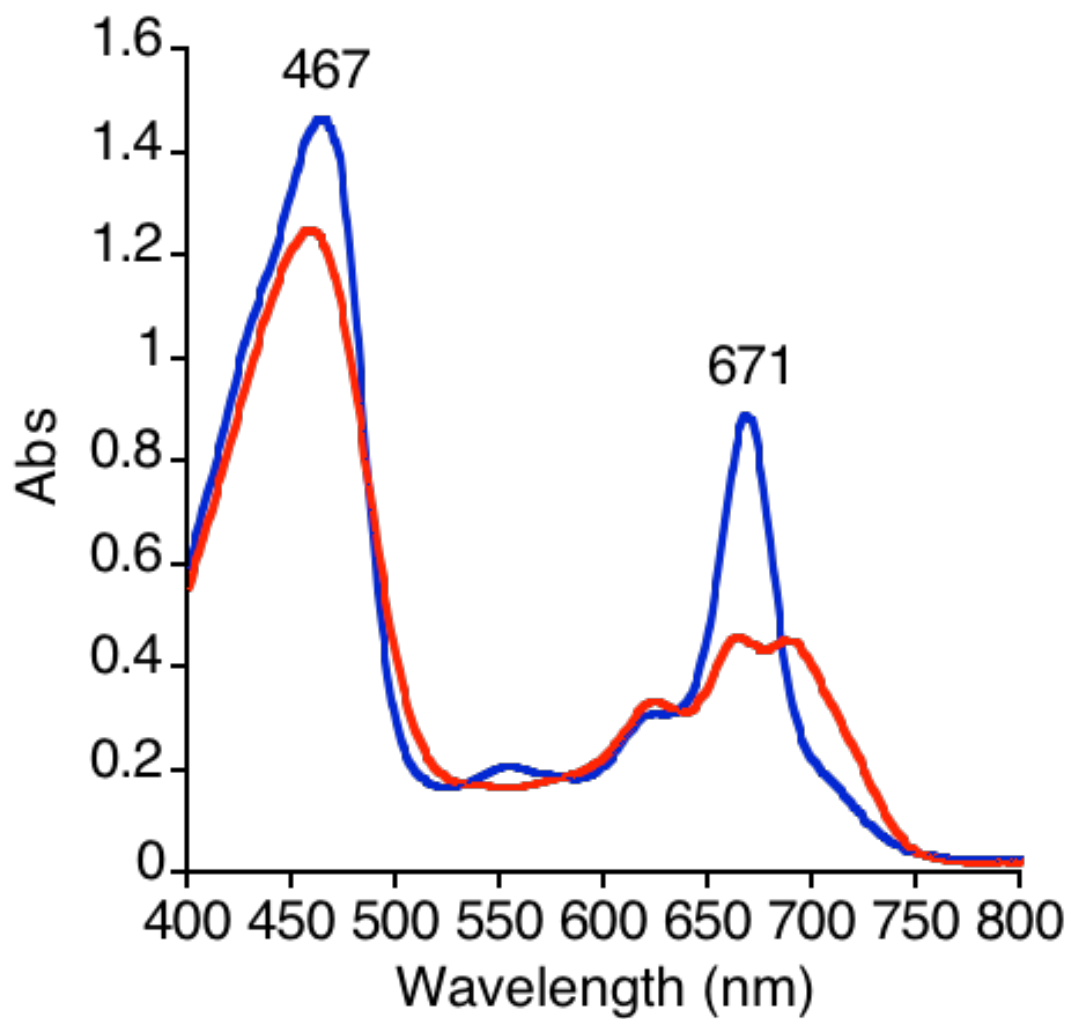

**Figure S3.** UV-vis spectrum of MeOP<sub>8</sub>CzH<sub>3</sub> in pyridine (blue) and CH<sub>2</sub>Cl<sub>2</sub> (red).

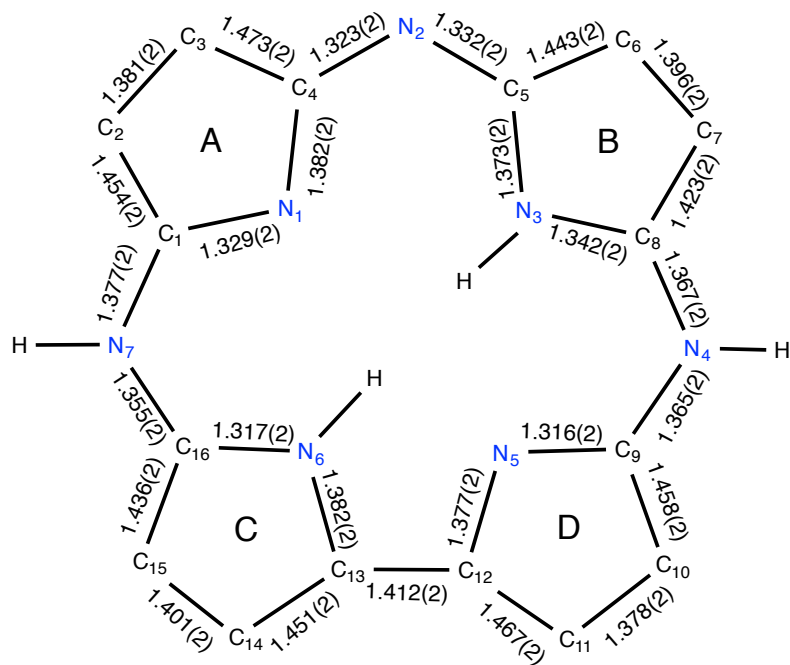

**Figure S4.** Bond lengths for the macrocyclic core of  $[\text{TBP}_8\text{CzH}_4]^+$  cation determined by single crystal X-ray crystallography.

**Table S1.** Selected Bond Lengths (Å) for *t*-Bu corrolazine complexes.

|                                                  | $\text{TBP}_8\text{CzMn}^{\text{III}}$ | $[\text{TBP}_8\text{CzMn}^{\text{III}}\text{H}][\text{BArF}]$ | $[\text{TBP}_8\text{CzMn}^{\text{III}}\text{H}_2][\text{BArF}]_2$ | $[\text{TBP}_8\text{CzH}][\text{BArF}]$ |
|--------------------------------------------------|----------------------------------------|---------------------------------------------------------------|-------------------------------------------------------------------|-----------------------------------------|
| $\text{C}_\beta\text{-C}_\beta$ (av)             | 1.393(5)                               | 1.385(7)                                                      | 1.391(3)                                                          | 1.389(2)                                |
| $\text{C}_\alpha\text{-C}_\beta$ (av)            | 1.447(5)                               | 1.445(6)                                                      | 1.442(3)                                                          | 1.451(2)                                |
| $\text{C}_\alpha\text{-C}_\alpha$                | 1.442(6)                               | 1.454(6)                                                      | 1.409(3)                                                          | 1.412(2)                                |
| (C12-C13)                                        |                                        |                                                               |                                                                   |                                         |
| $\text{C}_\alpha\text{-N}_{\text{pyrrole}}$ (av) | 1.378(6)                               | 1.370(6)                                                      | 1.366(3)                                                          | 1.352(2)                                |
| $\text{C}_\alpha\text{-N}_{\text{meso}}$ (av)    | 1.344(5)                               | 1.348(7)                                                      | 1.355(3)                                                          | 1.353(2)                                |

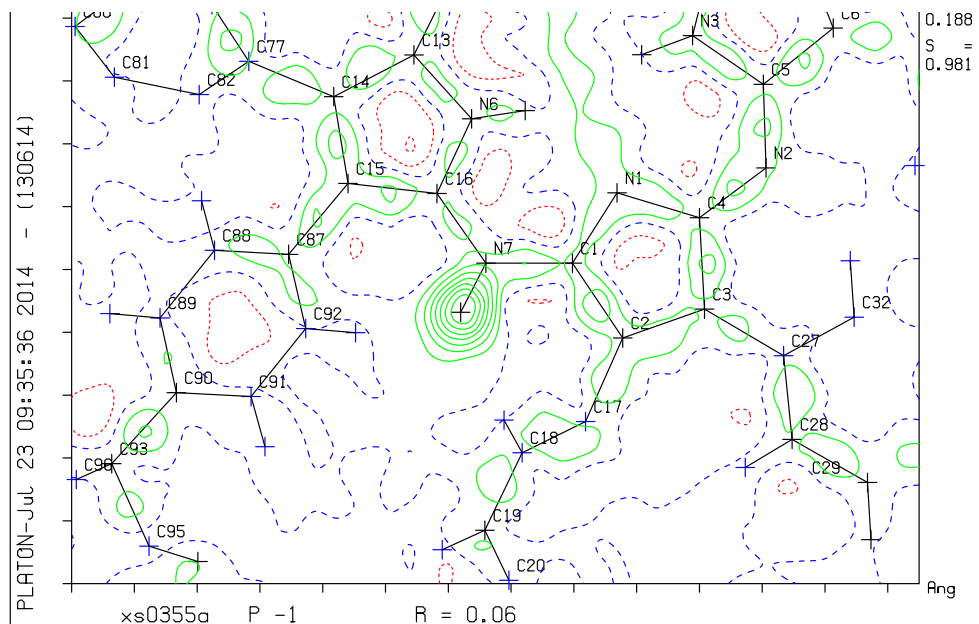

**Figure S5.** Electron density difference Fourier map drawn in the plane C1-N7-C16 showing the H atom attached to N7 on [TBP<sub>8</sub>CzH<sub>4</sub>]<sup>+</sup>.

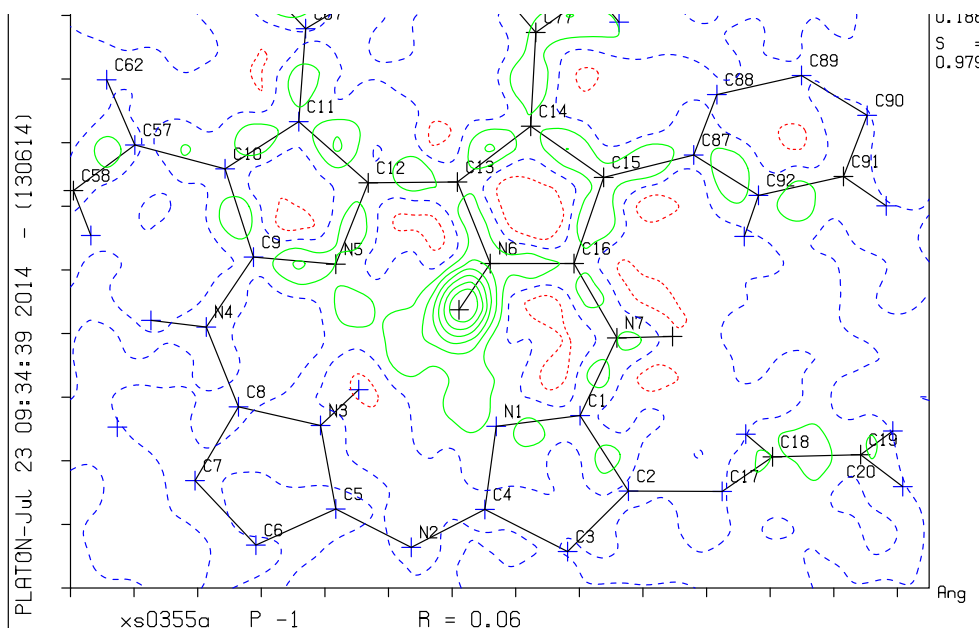

**Figure S6.** Electron density difference Fourier map drawn in the plane C13-N6-C16 showing the H atom attached to N6 on [TBP<sub>8</sub>CzH<sub>4</sub>]<sup>+</sup>.

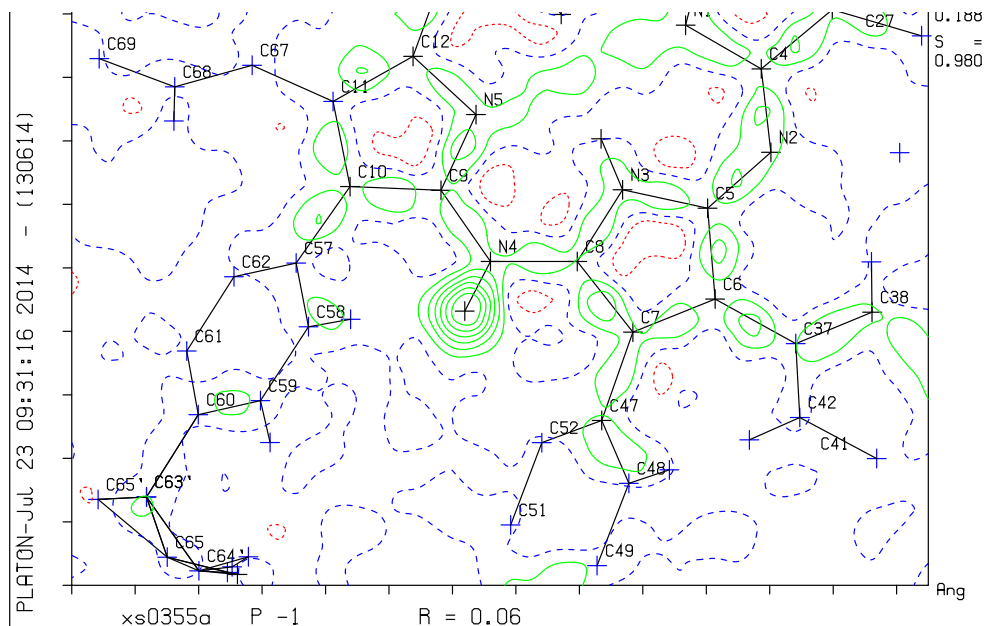

**Figure S7.** Electron density difference Fourier map drawn in the plane C8-N4-C9 showing the H atom attached to N4 on [TBP<sub>8</sub>CzH<sub>4</sub>]<sup>+</sup>.

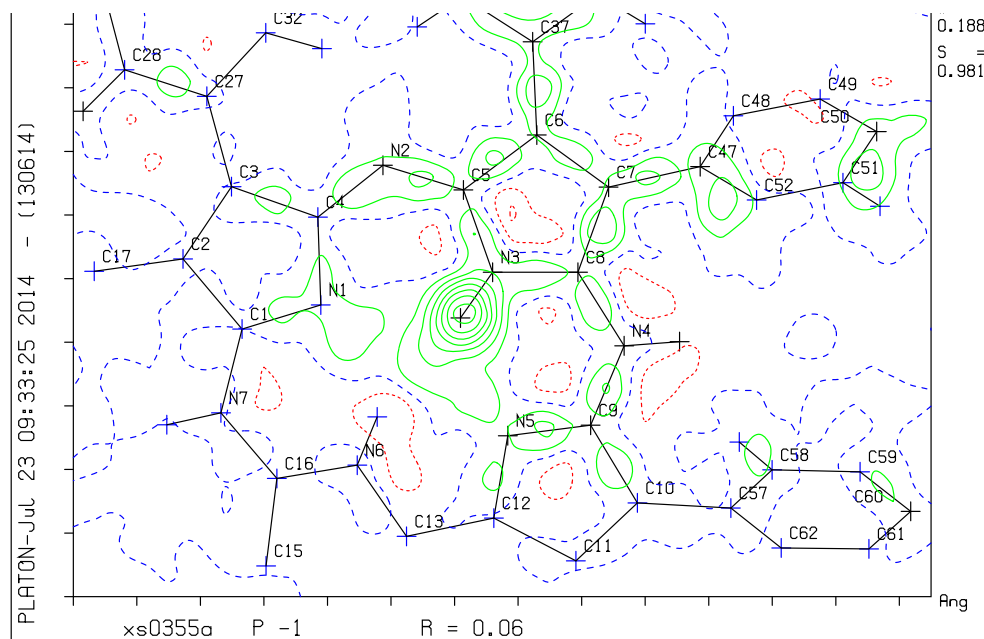

**Figure S8.** Electron density difference Fourier map drawn in the plane C5-N3-C8 showing the H atom attached to N3 on [TBP<sub>8</sub>CzH<sub>4</sub>]<sup>+</sup>.



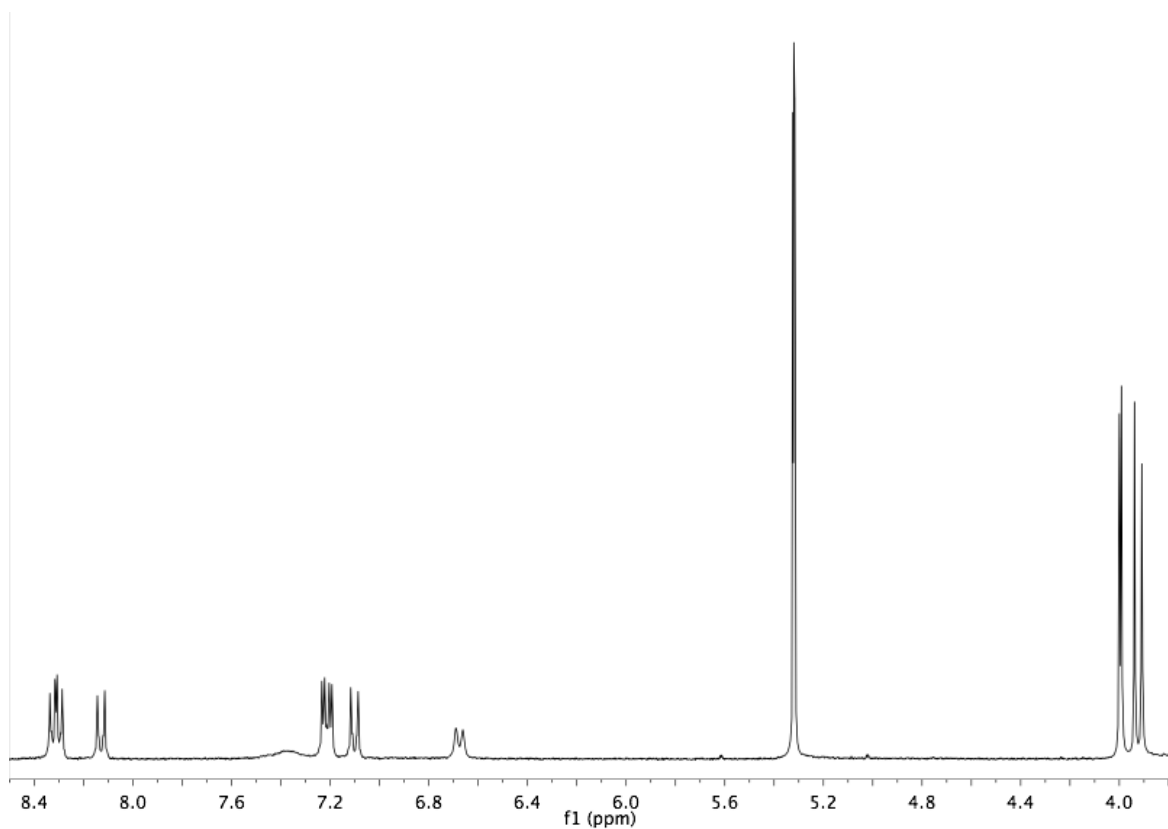

**Figure S9.**  $^1\text{H}$  NMR spectrum of  $[\text{P}^{\text{V}}(\text{MeOP}_8\text{Cz})(\text{OH})]\text{OH}$  in  $\text{CD}_2\text{Cl}_2$ .

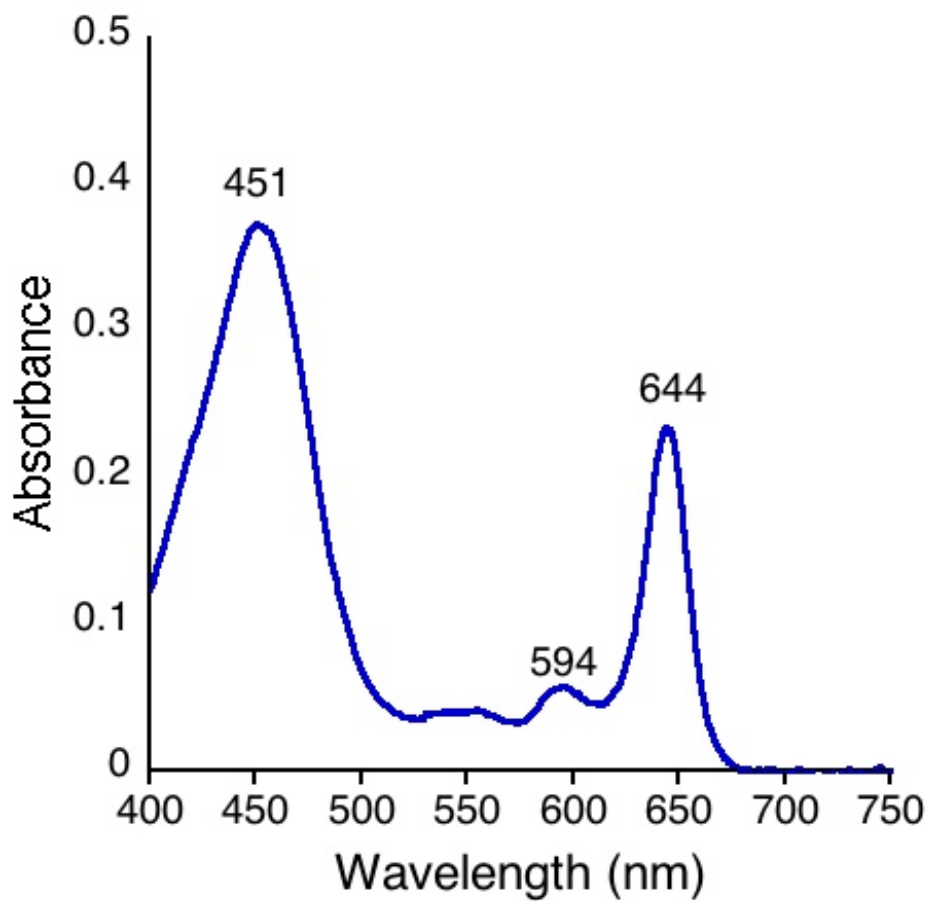

**Figure S10.** UV-vis spectrum of  $\text{P}^{\text{V}}(\text{MeOP}_8\text{Cz})(\text{OMe})_2$  in  $\text{CH}_2\text{Cl}_2$ .

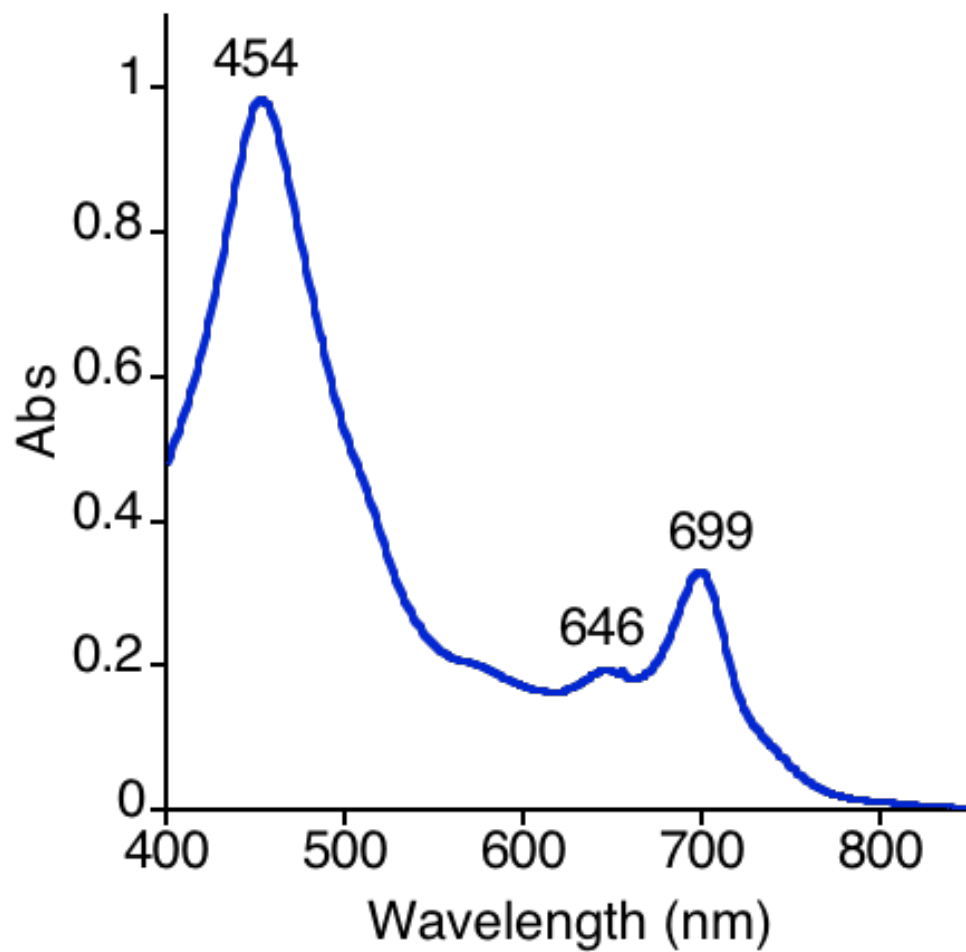

**Figure S11.** UV-vis spectrum of  $\text{Mn}^{\text{III}}(\text{MeOP}_8\text{Cz})(\text{pyr})$  in  $\text{CHCl}_3$ .

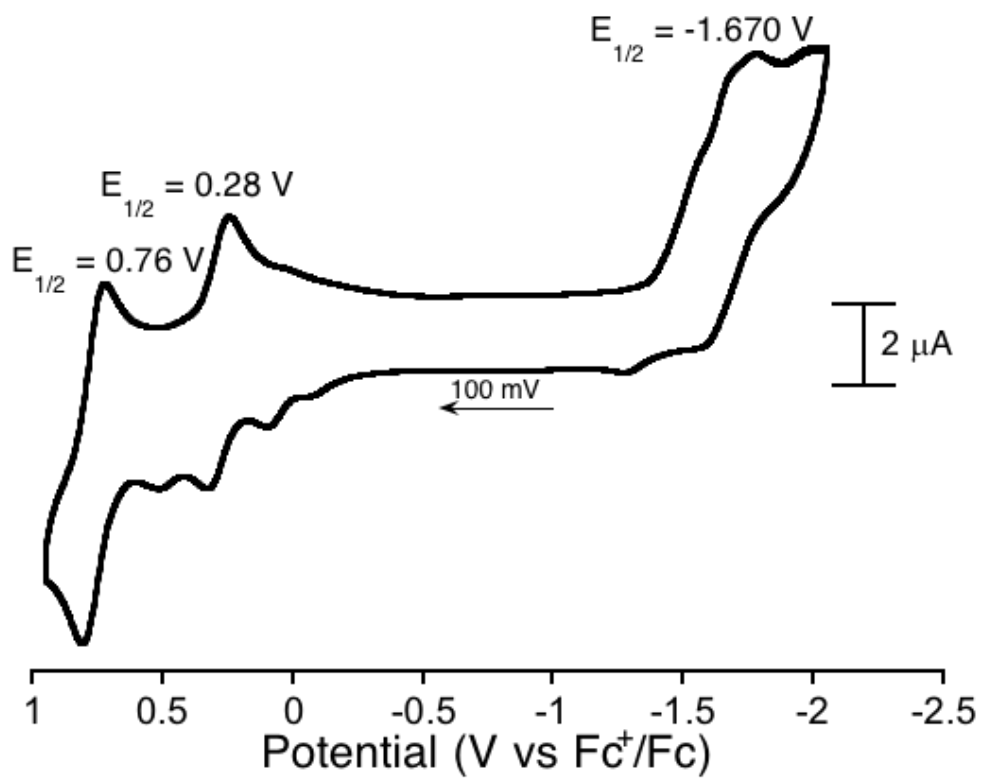

**Figure S12.** Cyclic voltammogram for Mn<sup>III</sup>(TBP<sub>8</sub>Cz) (0.3 mM) in CH<sub>2</sub>Cl<sub>2</sub> with 0.1 M Bu<sub>4</sub>N electrolyte.

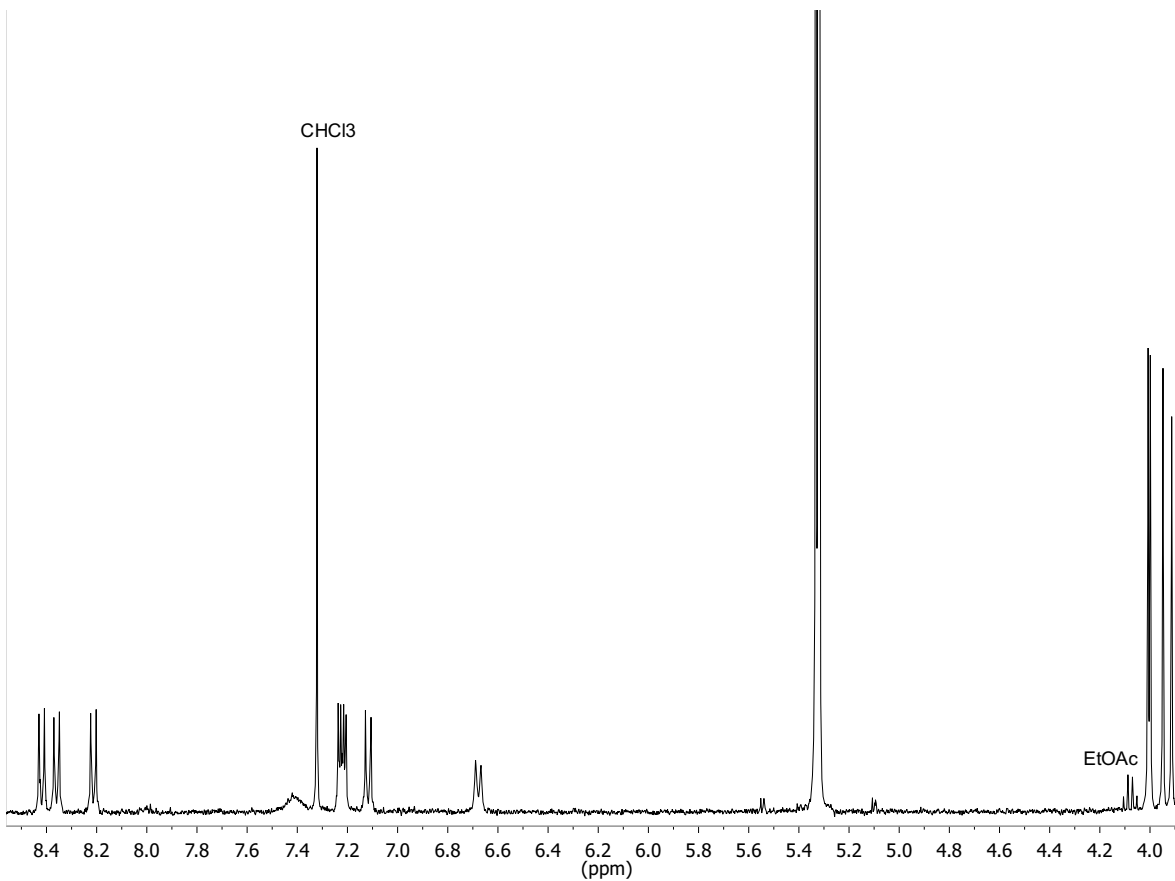

**Figure S13.** <sup>1</sup>H NMR spectrum of Mn<sup>V</sup>(O)(MeOP<sub>8</sub>Cz) in CD<sub>2</sub>Cl<sub>2</sub>.

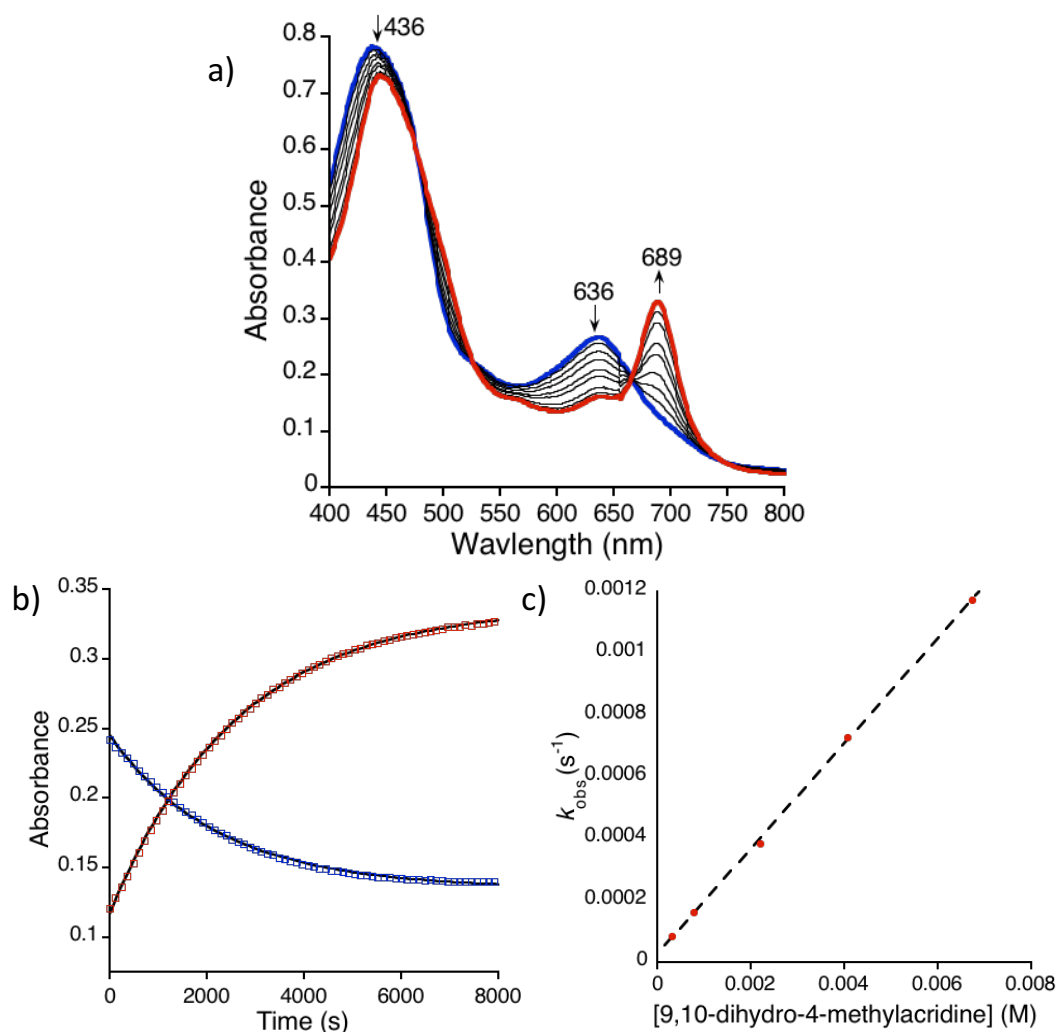

**Figure S14.** a) Time-resolved UV-vis spectral changes observed in the reaction of  $\text{Mn}^{\text{V}}(\text{O})(\text{MeOP}_8\text{Cz})$  (16  $\mu\text{M}$ ) with 9-methyl-9,10-dihydroacridine (2 mM) in  $\text{CH}_2\text{Cl}_2$  at 25  $^\circ\text{C}$ . b) Changes in absorbance vs. time for the growth of  $\text{Mn}^{\text{III}}(\text{MeOP}_8\text{Cz})$  (red circles) and decay of  $\text{Mn}^{\text{V}}(\text{O})(\text{MeOP}_8\text{Cz})$  (blue squares) with the best fit lines (black). c) Plots of pseudo-first-order rate constants ( $k_{\text{obs}}$ ) versus [9-methyl-9,10-dihydroacridine] ( $R^2 = 0.99$ ).

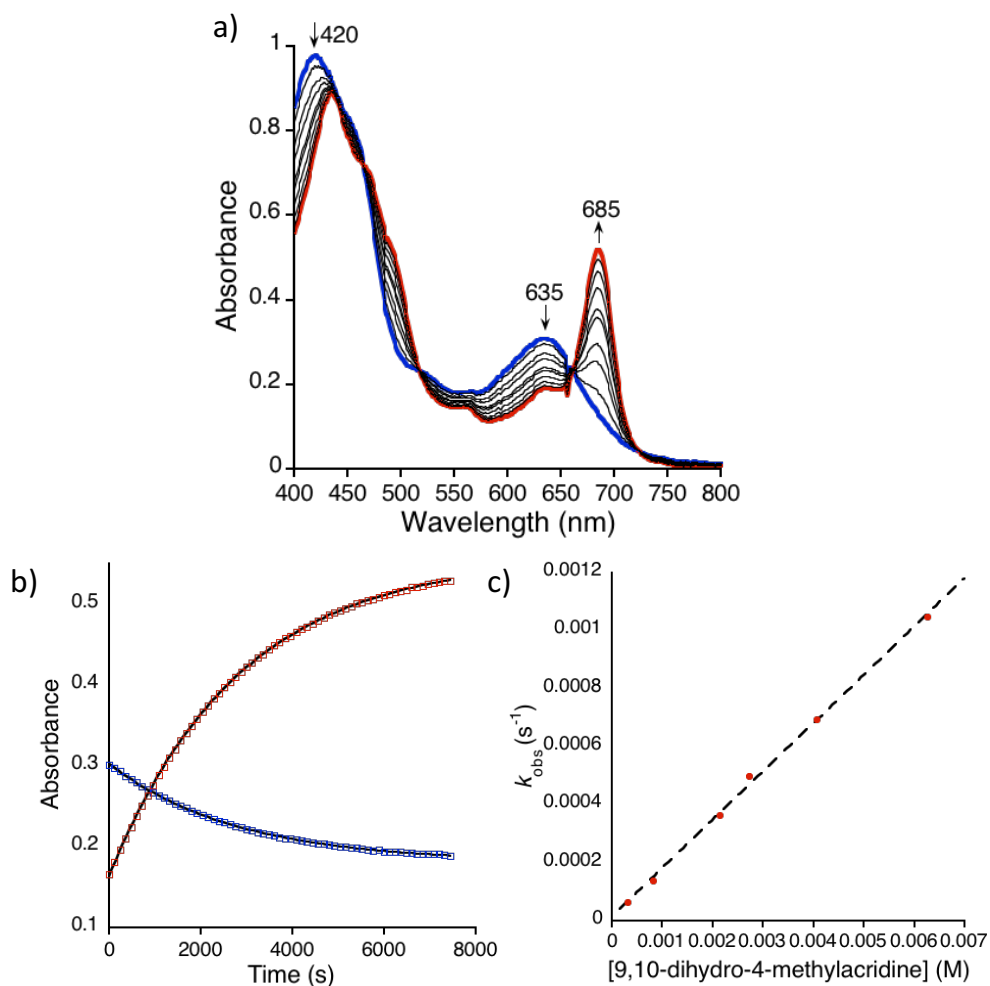

**Figure S15.** a) Time-resolved UV-vis spectral changes observed in the reaction of Mn<sup>V</sup>(O)(TBP<sub>8</sub>Cz) (15 μM) with 9-methyl-9,10-dihydracridine (2 mM) in CH<sub>2</sub>Cl<sub>2</sub> at 25 °C. b) Changes in absorbance vs time for the growth of Mn<sup>III</sup>(TBP<sub>8</sub>Cz) (red circles) and decay of Mn<sup>V</sup>(O)(TBP<sub>8</sub>Cz) (blue squares) with the best fit lines (black). c) Plots of pseudo-first-order rate constants ( $k_{\text{obs}}$ ) versus [9-methyl-9,10-dihydracridine] ( $R^2 = 0.99$ ).

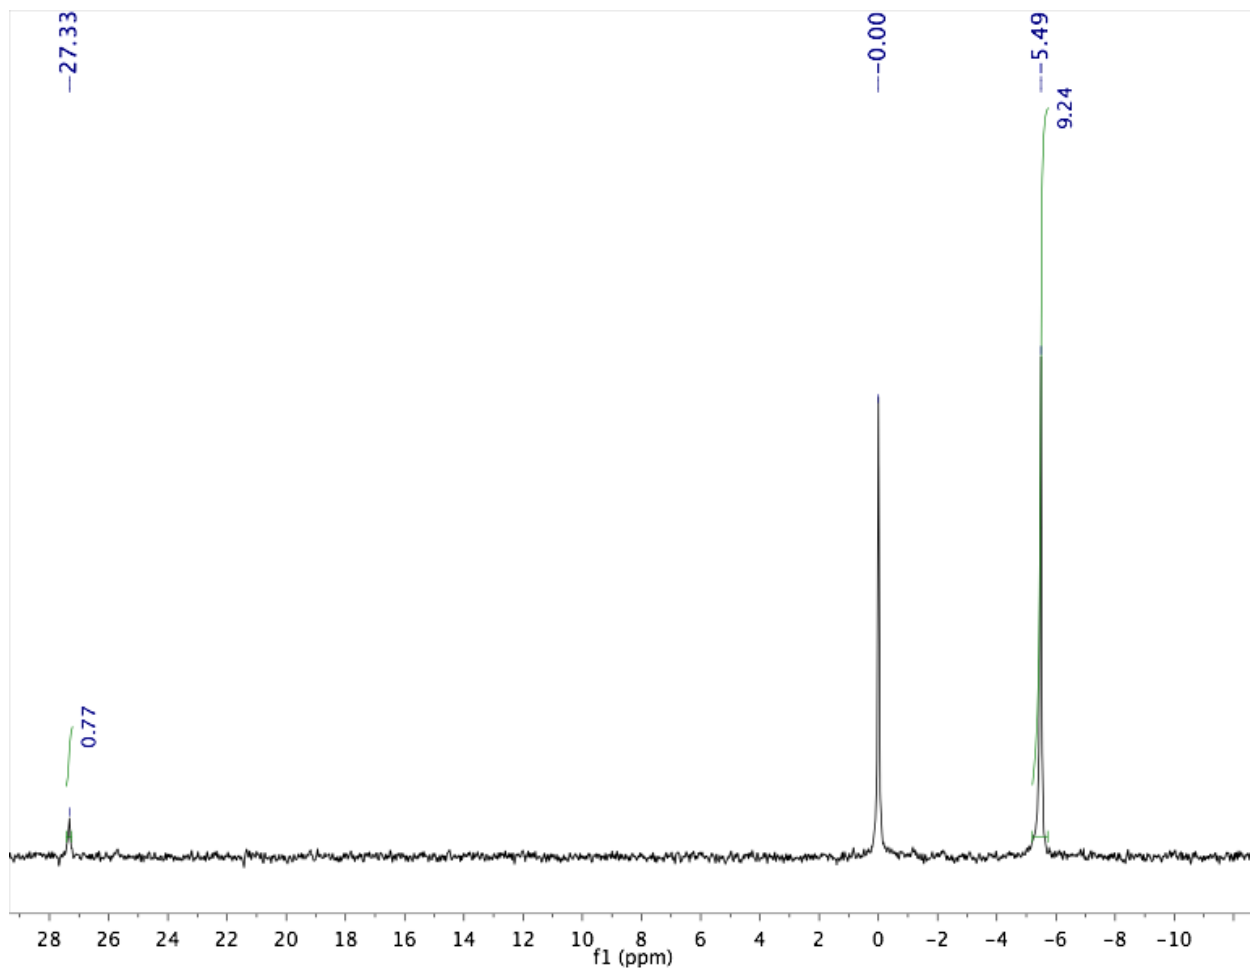

**Figure S16.**  $^{31}\text{P}\{^1\text{H}\}$  NMR spectrum for the reaction mixture of  $\text{Mn}^{\text{V}}(\text{O})(\text{MeOP}_8\text{Cz}) + 10 \text{PPh}_3$  after addition of excess  $\text{Bu}_4\text{N}^+\text{F}^-$  in  $\text{CD}_2\text{Cl}_2$ . Peaks for  $\text{PPh}_3$  ( $\delta = -5.5$  ppm) and  $\text{OPPh}_3$  ( $\delta = 27.3$  ppm) were observed. A yield of 77% for  $\text{OPPh}_3$  was obtained by comparison of the integration for  $\text{PPh}_3$  and  $\text{OPPh}_3$ . External standard  $\text{H}_3\text{PO}_4$  seen at 0.00 ppm.
